# Supplementary material for: Homeodomain-like DNA binding proteins control the haploid-to-diploid transition in Dictyostelium
Source: PubMed Central journal article supplement (PMC5580921; doi:10.1126/sciadv.1602937), 2017-09-01
Supplement: 1602937_SM.pdf [file 1602937_SM.pdf]

## Supplementary Materials for **Homeodomain-like DNA binding proteins control the haploid-to-diploid transition in *Dictyostelium***

Katy Hedgethorne, Sebastian Eustermann, Ji-Chun Yang, Tom E. H. Ogden, David Neuhaus, Gareth Bloomfield

Published 1 September 2017, *Sci. Adv.* **3**, e1602937 (2017)  
DOI: 10.1126/sciadv.1602937

### **This PDF file includes:**

- table S1. Structural statistics.
- table S2. Strains used in this study.
- fig. S1. SEC-MALS and CD data for MatA and MatB.
- fig. S2. RMSD and AMBER energy profiles for the 50 calculated structures of MatA and MatB.
- fig. S3. Views of the core homeodomain-like region of MatA.
- fig. S4. 2D  $^{15}\text{N}$ - $^1\text{H}$  HSQC spectra of MatA and MatB.
- fig. S5. The MatB S71A mutant.
- fig. S6. Secondary chemical shift data for MatA and MatB.
- fig. S7. Distant homology shared between *Dictyostelium* Mat proteins, homeodomains, and archaeal HTH domains.
- fig. S8. Provisional phylogenetic placement *Dictyostelium* Mat proteins, homeodomains, and archaeal HTH domains.
- fig. S9. Model of a potential DNA binding mode of MatA.
- fig. S10. The DNA binding activity of MatB S71A.
- fig. S11. CSPs for MatA as a function of added 58-bp DNA concentration.
- fig. S12. Spore size of haploid and parasexual diploid strains.
- fig. S13. Localization of Mat proteins tagged with fluorescent proteins.
- References (68–76)

## Supplementary Materials

**table S1. Structure statistics.** Structural statistics for the deposited ensembles of structures for MatA and MatB.

| <b>Structural restraints</b>                                                     | <b>MatA</b>       | <b>MatB</b>       |
|----------------------------------------------------------------------------------|-------------------|-------------------|
| NOE-derived distance restraints                                                  |                   |                   |
| Intraresidue                                                                     | 346               | 317               |
| Sequential                                                                       | 556               | 680               |
| Medium ( $2 \leq  i-j  \leq 4$ )                                                 | 475               | 548               |
| Long ( $ i-j  > 4$ )                                                             | 250               | 166               |
| Total                                                                            | 1627              | 1711              |
| <b>Statistics for accepted structures</b>                                        |                   |                   |
| Number of accepted structures                                                    |                   |                   |
|                                                                                  | 30                | 30                |
| Mean AMBER energy terms<br>(kcal mol <sup>-1</sup> ± S.D.)                       |                   |                   |
| E(total)                                                                         | -3589.0 ± 15.6    | -4184.4 ± 17.0    |
| E(van der Waals)                                                                 | -616.4 ± 10.0     | -618.2 ± 9.9      |
| E(distance restraints)                                                           | 29.1 ± 3.0        | 19.4 ± 2.4        |
| Distance restraint viols. > 0.2 Å<br>(average number per structure)              |                   |                   |
|                                                                                  | 5.3 ± 2.1         | 1.7 ± 1.4         |
| RMS deviations from the ideal<br>geometry used within AMBER                      |                   |                   |
| Bond lengths                                                                     | 0.0101 Å          | 0.0105 Å          |
| Bond angles                                                                      | 2.04°             | 2.05°             |
| <b>Ramachandran statistics</b>                                                   |                   |                   |
|                                                                                  | <b>MatA</b>       | <b>MatB</b>       |
|                                                                                  | <b>Res. 35-79</b> | <b>Res. 35-79</b> |
| Most favoured                                                                    | 91.2%             | 80.6%             |
| Additionally allowed                                                             | 8.1%              | 15.3%             |
| Generously allowed                                                               | 0.7%              | 4.1%              |
| Disallowed                                                                       | 0.0%              | 0.0%              |
| <b>Average atomic RMS<br/>deviations from the average<br/>structure (± S.D.)</b> |                   |                   |
|                                                                                  | <b>MatA</b>       | <b>MatB</b>       |
|                                                                                  | <b>Res. 35-79</b> | <b>Res. 35-79</b> |
| (N, C $\alpha$ , C' atoms)                                                       | 0.31 ± 0.06 Å     | 0.36 ± 0.09 Å     |
| (All heavy atoms)                                                                | 0.67 ± 0.06 Å     | 0.76 ± 0.10 Å     |

**table S2. Strains used in this study.** Names of strains, names of parental strains (if any), mating types, and genotypes are given. Mating type 'Iib' and 'Iic' are partial type-II phenotypes, in that type Iib will mate with type III cells only and type Iic will mate with type I cells only. The PDGB diploids listed here are hemizygous null/*matBCD*, and so phenotypically type II. The source of strains are numbered according to the citation in the reference list except for those strains originating in this study (A); and (B) an unpublished strain generated by Peggy Paschke.

| Strain | Parent                              | Mating type | Genotype                                                                                   | Source |
|--------|-------------------------------------|-------------|--------------------------------------------------------------------------------------------|--------|
| AX2    | AX1 (NC4 derived)                   | I           | <i>axeA2, axeB2, axeC2, matA(1)</i>                                                        | (68)   |
| HM140  | NP2 (NC4 derived)                   | I           | <i>axeA1, axeB1, axeC1, matA(1)</i><br><i>tsgA1, cyc-905</i>                               | (69)   |
| HM27   | DM16 (HM3 x HM30;<br>V12M2-derived) | II          | <i>tsg-901</i> and/or <i>tsg-903, whi-900,</i><br><i>cyc-900, matBCD(2)</i>                | (70)   |
| HM1524 | AX2                                 | null        | <i>axeA2, axeB2, axeC2,</i><br><i>matA(GB1), bsR</i>                                       | (24)   |
| HM1525 | HM140                               | null        | <i>axeA1, axeB1, axeC1,</i><br><i>matA(GB1), tsgA1, cyc-905, bsR</i>                       | A      |
| HM1526 | HM1524                              | null        | <i>axeA2, axeB2, axeC2,</i><br><i>matA(GB1)</i>                                            | (24)   |
| HM1557 | HM1525                              | null        | <i>axeA1, axeB1, axeC1,</i><br><i>matA(GB1), tsgA1, cyc-905</i>                            | A      |
| HM1559 | HM1526                              | II          | <i>axeA2, axeB2, axeC2,</i><br><i>matBCD(GB1), bsR</i>                                     | A      |
| HM1875 | AX2                                 | I           | <i>axeA2, axeB2, axeC2, matA(1),</i><br><i>LifeAct-mRFP, bsR</i>                           | B      |
| HM2935 | HM1557                              | Iic         | <i>axeA1, axeB1, axeC1,</i><br><i>matA(GB1), tsgA1, cyc-905,</i><br><i>mRFP-matC, neoR</i> | A      |
| HM2955 | HM1557                              | Iib         | <i>axeA1, axeB1, axeC1,</i><br><i>matA(GB1), tsgA1, cyc-905,</i><br><i>matB-GFP, neoR</i>  | A      |
| NC4(S) | wild isolate                        | I           | <i>matA(1)</i>                                                                             | (71)   |
| PDGB1  | HM27 x HM1525                       | II          | (HM27 x HM1525 diploid)                                                                    | A      |
| PDGB4  | HM27 x HM2955                       | II          | (HM27 x HM2955 diploid)                                                                    | A      |
| PDGB5  | HM27 x HM2935                       | II          | (HM27 x HM2935 diploid)                                                                    | A      |
| PXGB21 | PDGB1                               | null        | <i>matA(GB1), whi+</i>                                                                     | A      |
| PXGB22 | PDGB1                               | null        | <i>matBCD, whi-</i>                                                                        | A      |
| PXGB23 | PDGB1                               | null        | <i>matBCD, whi-</i>                                                                        | A      |
| V12M2  | V12                                 | II          | <i>matBCD(2)</i>                                                                           | (72)   |
| WS2162 | wild isolate                        | III         | <i>matST(1)</i>                                                                            | (73)   |
| X22    | DP4 (M28 x NP14; NC4<br>derived)    | I           | <i>whiA1, tsgD12, tsgE13, acrA1,</i><br><i>sprA1</i>                                       | (74)   |

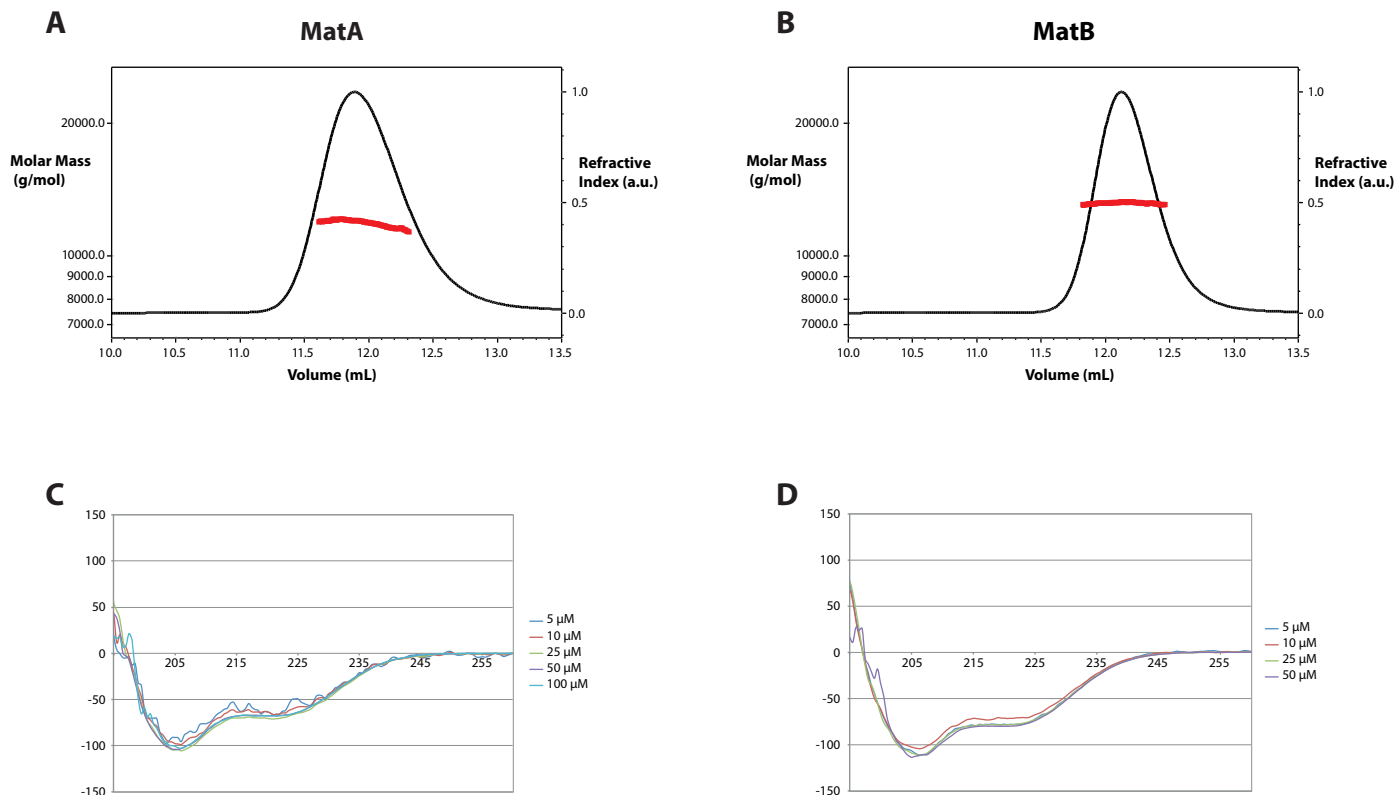

**fig. S1. SEC-MALS and CD data for MatA and MatB.** SEC-MALS experiments with both (A) MatA and (B) MatB clearly show them each to be monodisperse and monomeric in solution [MatA molecular mass  $11.9 \pm 0.1$  kDa (theoretical 12.5), MatB molecular mass  $13.2 \pm 0.1$  kDa (theoretical 12.6); molecular masses were calculated as averages across the region indicated and data were recorded in 20mM phosphate, 50mM NaCl, 2mM EDTA, pH7]. CD spectra for (C) MatA and (D) MatB show that in both cases the overall structure is independent of protein concentration over a wide range (spectra recorded in 50mM phosphate, 100mM NaCl, pH6; in each case, intensities have been multiplied by a normalization factor to aid comparison).

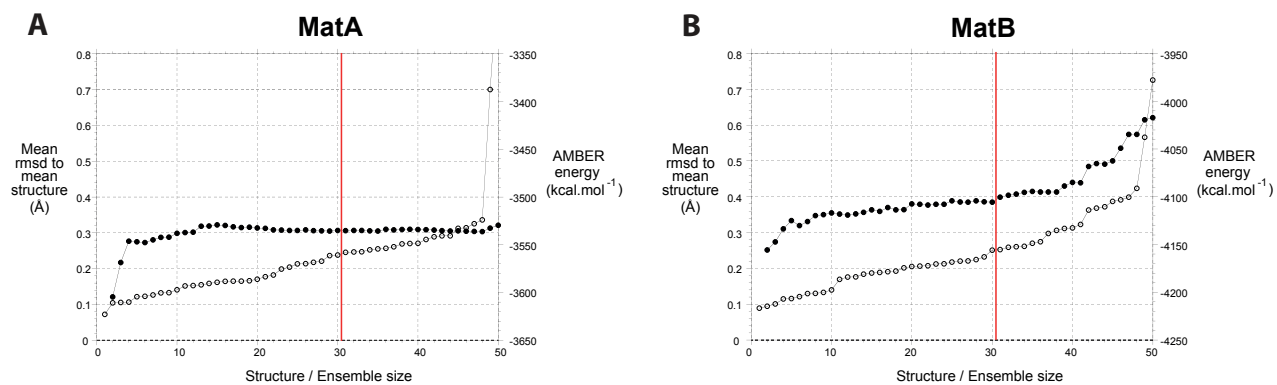

**fig. S2. RMSD and AMBER energy profiles for the 50 calculated structures of MatA and MatB.** Rmsd values (filled circles) are independently calculated for each ensemble size using the program CLUSTERPOSE (63), adding successive structures in order of increasing AMBER energy; open circles represent the AMBER energies of each structure. In each case, only the 30 structures to the left of the vertical red line were included in the deposited ensemble and when calculating the structural statistics.

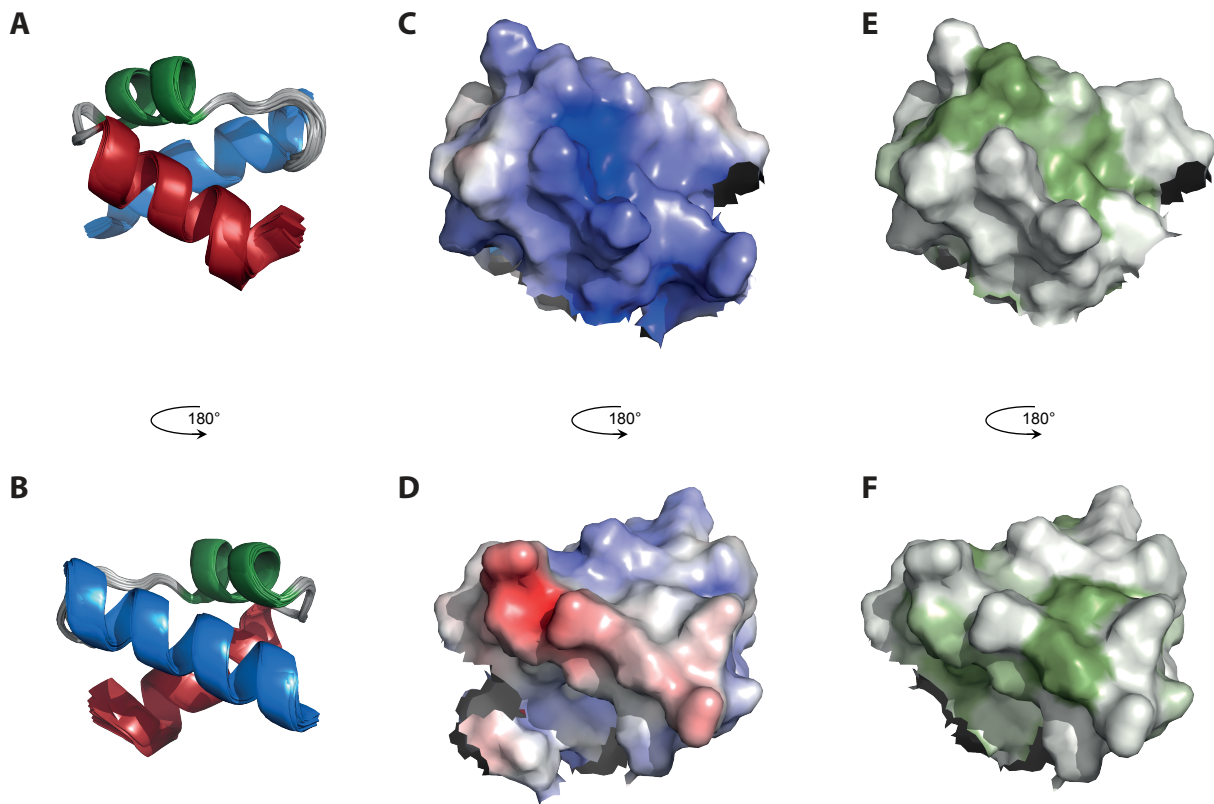

**fig. S3. Views of the core homeodomain-like region of MatA.** Showing the backbone cartoon representation (**A** and **B**), and the electrostatic (**C** and **D**), and hydrophobic (**E** and **F**) surfaces (panels A, C and D also appear in Fig. 1, and are repeated here to facilitate comparison). The disordered tails have been omitted from these views; relationships between the orientations of different structural views are indicated on the figure, and relative scalings of the views were chosen for clarity.

**A**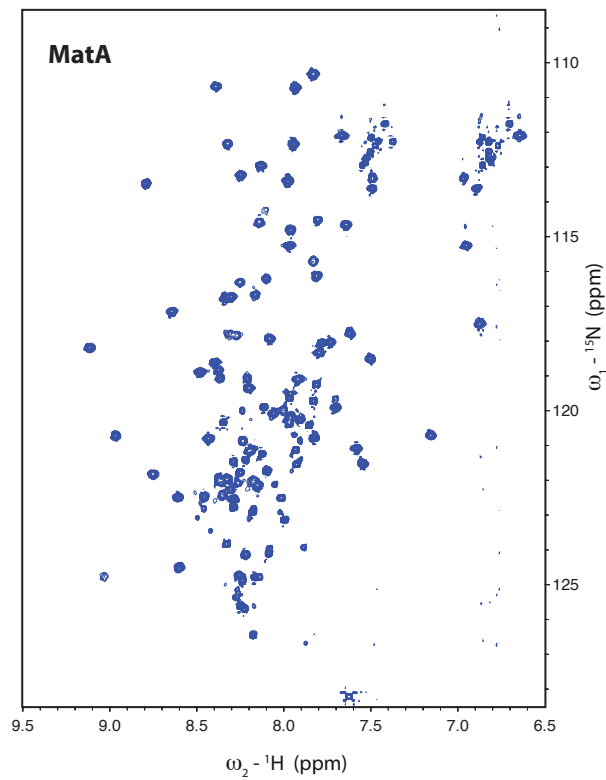**B**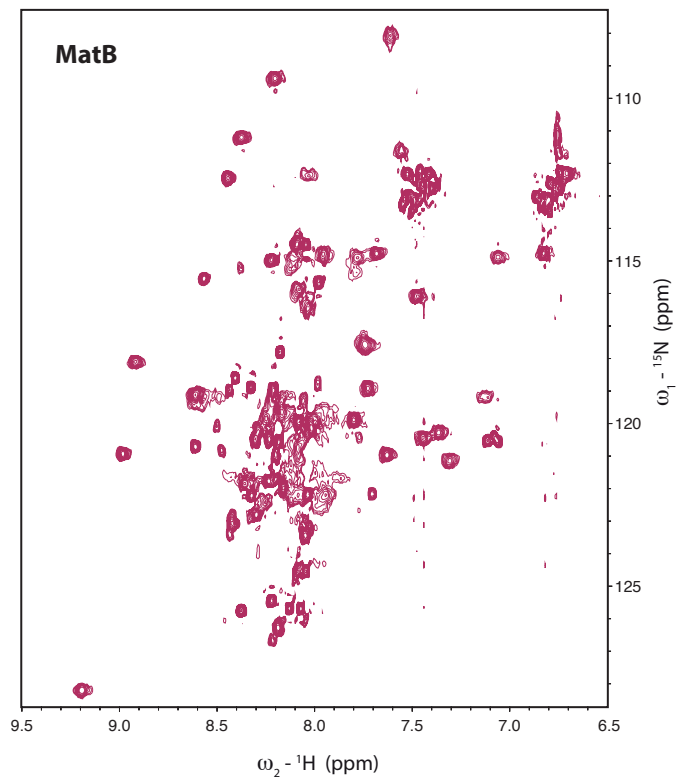

**fig. S4. 2D  ${}^{15}\text{N}$ - ${}^1\text{H}$  HSQC spectra of MatA and MatB.** The spectrum of MatB suffers from significant line broadening compared to that of MatA.

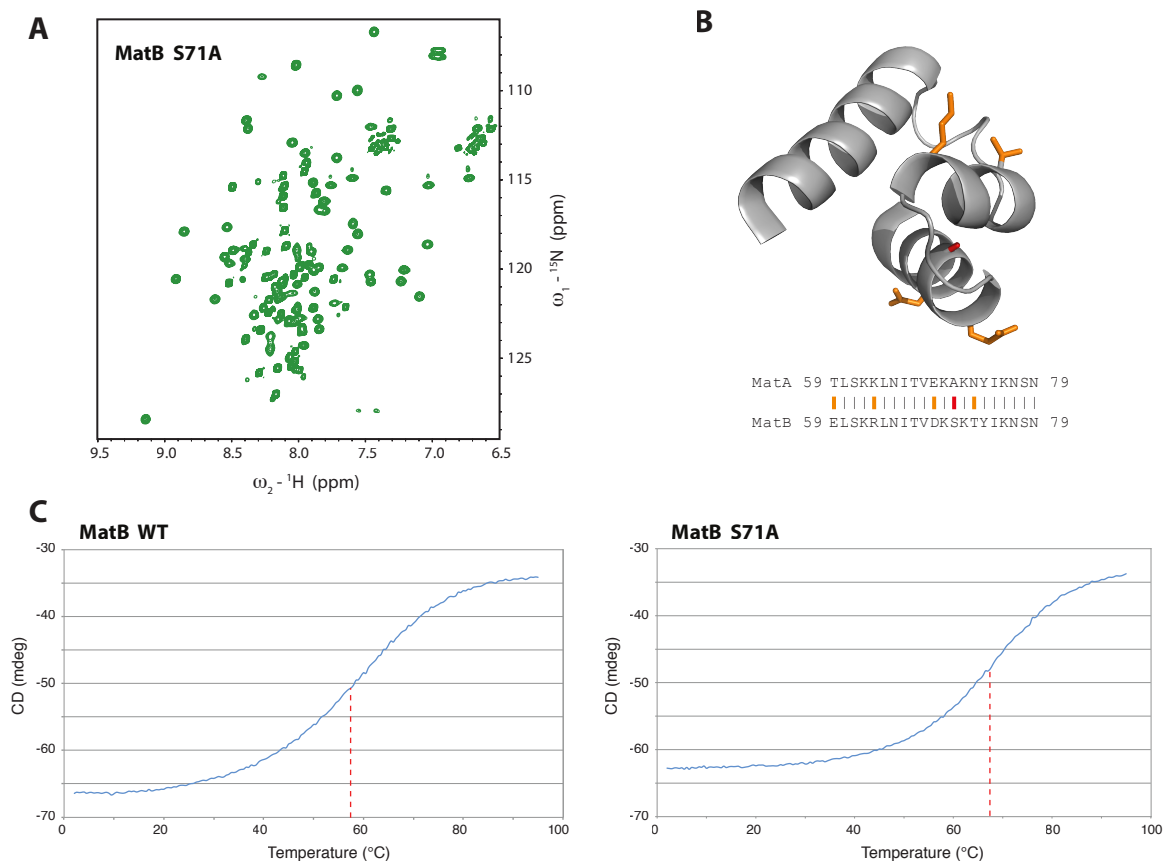

**fig. S5. The MatB S71A mutant.** The single point mutation S71A improved the quality of the NMR data such that an essentially complete resonance assignment could be obtained for this mutant. **(A)** The 2D [ $^{15}\text{N}$ - $^1\text{H}$ ] HSQC spectrum of S71A MatB was recorded at the reduced temperature of 1  $^{\circ}\text{C}$  and shows a considerable improvement, in terms of linewidth and peak resolution, compared to the wild type protein. **(B)** Inspection of the MatA structure suggests that the S71 side-chain of MatB is likely to be buried at the interface between helices 2 and 3, suggesting that the larger, more polar serine side-chain at this position in MatB causes destabilisation of the structure; differences between the MatA and MatB sequences in this region are indicated, and the corresponding sidechains are highlighted on the MatA structure. **(C)** Assessing the thermal stability of MatB and MatB S71A. Circular dichroism was followed at 222 nm as the samples were heated from 2-95  $^{\circ}\text{C}$ , and  $T_m$  values, indicated by the dashed red lines, correspond to the midpoint of the transition between the folded and unfolded states. These were calculated by fitting the data to a sigmoidal curve. The  $T_m$  value of wild-type MatB is 58  $^{\circ}\text{C}$  while that of MatB S71A is 68  $^{\circ}\text{C}$ ; this suggests that it may indeed be an increase in the thermal stability of the mutant, relative to wild-type MatB, that results in the improvements seen in the NMR data recorded for this protein.



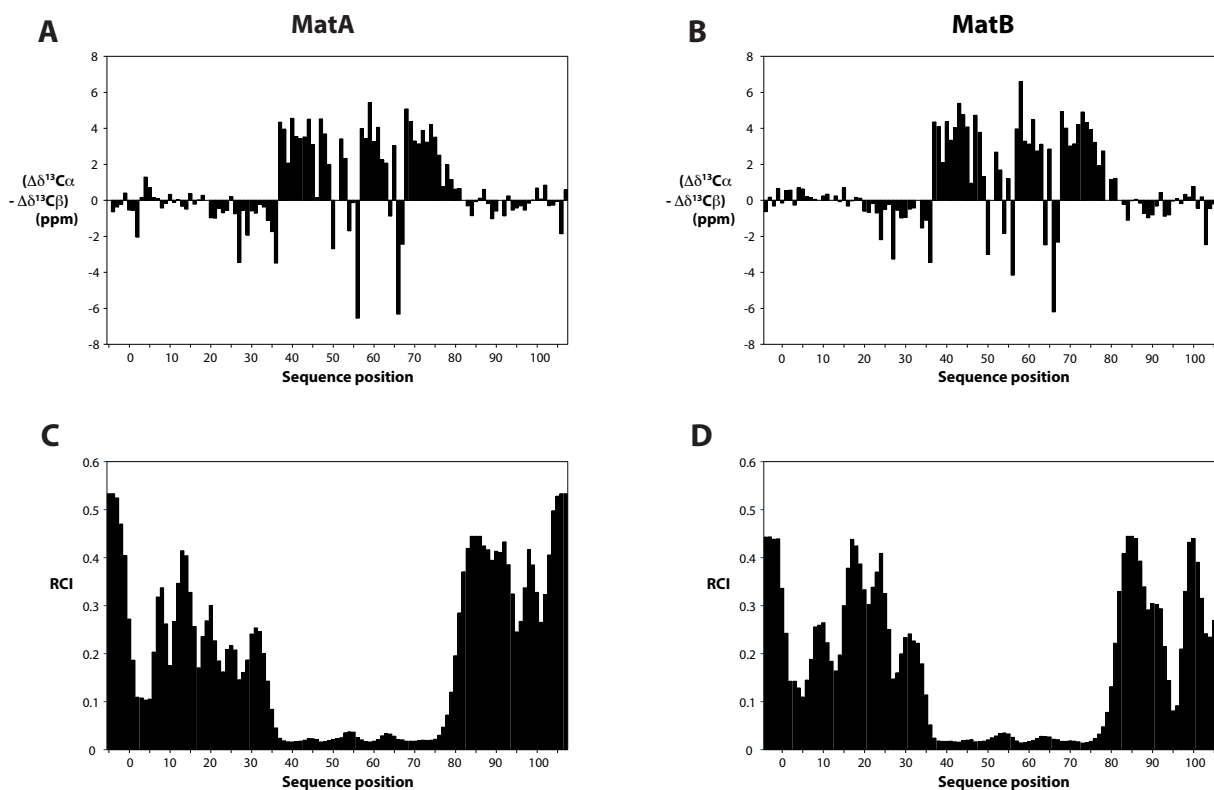

**fig. S6. Secondary chemical shift data for MatA and MatB.** Panels (A) and (B) show values of  $(\Delta\delta^{13}\text{C}\alpha - \Delta\delta^{13}\text{C}\beta)$ , where  $\Delta\delta^{13}\text{C}\alpha$  is the difference between the experimentally measured value of  $\Delta\delta^{13}\text{C}\alpha$  for a given residue and the corresponding random coil value, while  $\Delta\delta^{13}\text{C}\beta$  is the corresponding quantity for  $\text{C}\beta$  (values were calculated using python scripts within the program CCPN analysis (55)). These plots show very similar patterns for MatA and for MatB. In each case, the N- and C-terminal tails show mainly small values suggesting they lack persistent structure, though for both MatA and MatB the region of residues approx. 20-40 shows values consistent with at least partial order. The patterns for the folded regions of MatA and MatB are also very similar between the proteins; in each case the three helices of the folded region correspond to regions with consistently large positive values of  $(\Delta\delta^{13}\text{C}\alpha - \Delta\delta^{13}\text{C}\beta)$ , while the turn regions also show similar patterns between MatA and MatB. Panels (C) and (D) show plots of the Random Coil Index (RCI) (26); for both MatA and MatB, the N- and C-terminal tails show high, though non-uniform, RCI values, consistent with our interpretation that these regions are largely unfolded but have some elements of residual structure, while the folded regions show uniformly low values. (N.B. all four panels include data for the 6-residue cloning artifact (GSHMAS) at the N-terminus, numbered -5 to 0).

A0A098\_CHLRE RPKV GKL PPAATQLLKGWDD - - NFVWPYPSEEDKKQLGEAAALNNTQINNWFINQRKRHW  
A9T288\_PHYPA KRRAGKLP EGT TTVLKA WQA - - HSKWPYPTEDEKERLIQETGLELQVNNWFINQRKRHW  
A9SGQ5\_PHYPA KRRAGKLP EGT TTVLKA WQA - - HSKWPYPTEDEKEQLIQETGLELQVNNWFINQRKRHW  
HBX9\_DICDI RKKR GKL PGEATSILKKWLF - - HNMHPYPTEEEKVALANSTFLS FNQINNWFITNARRRIL  
HBX4\_DICDI P KKGAKLSKESKDILENWIKN - - HIAHPYPTNDEKEQLQRQTGLT P NQISNWFINTRRRKV  
HBX12\_DICDI KKNRRTLNDQYKSFISDYFKN - - HSDHPYPNEDEKIIISALIDL SKYQRNNWFSNKR SREK  
HBX3\_DICDI FKSRRILSEQ E T N M N L W F D A - - H V N N P Y P E E D E K V I L G A V N N L S K S Q I D N W F G N K R M R D K  
MTAL2\_YEAST PYR G H R F T K E N V R I L E S W F A K - - N I E N P Y L D T K G L E N L M K N T I S L S R I Q I K N W V S N R R R K E K  
MTAL2\_KLUDE PYR G H R F T K E N V H T L E A W Y S N - - H I D N P Y L D P K S L Q S L A Q K T N L S K I Q I K N W V S N R R R K Q K  
MTAL2\_PICAN EKRSKRFPKTAQMELENWYTE - - NEDNPYLSKRDLQQLVHKTGLCAPQVRN WVS NRRRKER  
MTAL2\_CANAL KIKSRRLTKKQLLVLEGWFK - - HKNHPYSQKDQTNLLIKSTKLSKSQVQNWISNRRRKEK  
HBX2\_DICDI KKRRLRLKKEQADILKTFDFN - - - - DDYPTKDDKETLANRLGMSYCAVTTWFSNKRQEKK  
WARA\_DICDI KKKRKRTPDQLKLEKIFMA - - - - HQHPNLNLRSQLAVELHMTARSVQIWFQNRRAKAR  
MATA1\_YEASX PKGKSSIS PQARAFLEQVFRR - - - - KQSLNSKEKEEVAKKCGITPLQVRVWFINKRMRSK  
MATA1\_PICAN KKKRRHIPESSELLEKAFKV - - - - KRFPNSKERERIARECGISPLQVRVWFTNKRARSK  
MATA1\_KLUDE HKRGCNIDKKT K D M L N K V Y E Q - - - - K Q Y L T K E E R E F V A K K C N L T P L Q V R V W F A N K R I R N K  
HBX6\_DICDI SGQRSLKTKHEKEILEALYRV - - - - TLYPTSEETKTISQILGMTFGQVKS SFRHRREKLS  
ANTP\_DROME KRGRQTYTRYQ TLELEKEFHL - - - - NRYLSTRRRRIEIAHALCTERQIKIWFQNRMRKWK  
D8PSE1\_SCHCM AQPVNLLKRARRPLLDRYFDL - - - - NAYPSVTDKKALAAHEGATYRQIHVWFQNRRAKAR  
CF1A\_DROME RKKRTSIEVSVKGALEQHFHK - - - - QPKPSAQEITSLADSLQLEKEVVRVWF CNRRQEK  
HBX5\_DICDI SRRKNRFTDFQIKRMNDCFENLDKNNNGKFTSEEICQIATELGLTDQQVRVVFQNKRRASR  
HBX13\_DICDI KMRKTRTPDKIYLEIYYQHF - - YENNGKHSKDELITLSNNLNWKNRIQRWLDNRRTKDK  
HBX7\_DICDI NIRNIRSSGISTKKLEDFFSI - - - - NQYPNKNEIKDFANYYQCDETKIKNWFKGRDRLK  
Dd\_MatA KPKLEELSEQKIILA EYIAE - - VGLQNI - - - - TAITLSKKLNITVEKAKNYIKNSNRLGR  
Dc\_MatA KPKARELSEEKIILA EYITE - - VGLHNI - - - - TAITLSKKLDITLEKAQNYIKNN - RLSR  
Dd\_MatB TQKTGELSEEKKIVADYISE - - VGLNNL - - - - NATELSKRLNITVDKSKTYIKNSNRMGR  
Di\_MatAB KPKKDELTK E Q K I I L A E Y I Q E - - DAINSI - - - - RAIDLAKRLNITVEKARSYLKNSKRSNR  
Df\_MatB GPKTSELSKEQKIMVIDRILE - - VGLDNI - - - - TALDLSEKLNIPLKAHAETIYIKNSKRSNR  
Dg\_MatAB KPKANELTDEQKIVVNFIL - - VGLDNI - - - - TQHSKQLSEKLDIPVDKAHHYLRNSLRSDR  
E6P9F4\_9ARCH FNLRAVLT PKQ QVLYTAFMM - - - - GYFSPSRETSLSEIATRIGLSKSTVSRHLRTAMR KLA  
Q4J721\_SULAC MMILSSLTPT ERQ ILYTAYKM - - - - GFFDYPKTKLEELAKMYGVTKVALDRHIRN AIRKVL  
Q4J6W2\_SULAC EIDESELTDR OLEILRLAYKS - - - - GYFDVDRKISMKELANKLGIKASTLEEILRRALKKAV  
E1QSW8\_VULDI QLPMPSP T ERQ LEVLLLAYKM - - - - GYFD - - REVNLKELAKQLGLSISTVSELLRKT LKKVV  
B1L500\_KORCO VKRGRMLT ERQ EEVLLTAVRM - - - - GYFDFP R R I R T R E L A D M L G M S Q A S L T E I L R R A V K K L V  
Q4JBG3\_SULAC AKPSSII TGR OEQ I L K I A E L E L - - - - GYFDFP R R I R L N E L S K K L N I S T S T L A E I I R R A E R N I I  
E6N6W5\_9ARCH VKPNGGLT SRQ ELI I K A A E L E L - - - - GFFDYPK K I H V K E L A Q L F G I T P A T L T E T M R K A M K R I V  
G0EGP6\_PYRF1 DEYDYMLTEK QERILIEAYLR - - - - GYFSFPRKISMKDLAKELGMSVSSLAELLRKA EAKVV  
E6P9G1\_9ARCH IRAKHFLT PRQ EQVLLHSYLN - - - - GYFDNPRPIPLSKLAKDLGITPPSYLELLR KALKKVV  
A1S0N6\_THEPD TDLLSKLTPLOR KILSKAIK - - - - GYFDWPRKYSLSLDSQELGISKATLAEHIRRSSEKIL  
E1QSY1\_VULDI SRLDVFLNSS YKVL RHA FER - - - - GFFNIPRSISMDEL SKELGLSKSTIDRYLRSSLNKIL  
Q4J6J7\_SULAC DMFFPYLSPSQVRVLKAAF EY - - - - GYLDYPREANADILAEKLNISKVTFLYHLRS AEKLV

**fig. S7. Distant homology shared between *Dictyostelium* Mat proteins, homeodomains, and archaeal HTH domains.** The HTH regions of MatA/B-related proteins from dictyostelids were aligned with those from selected homeodomain, TALE homeodomain, and HTH-10 family proteins. One homeodomain from a Pou family transcription factor (CF1A\_DROME) was also incorporated. Several *D. discoideum* homeodomain sequences (containing 'DICDI' in their identifiers) are included to emphasise the divergence of the Mat proteins from 'conventional' homeodomains, which are conserved across eukaryotes. Archaeal HTH-10 proteins are likely near-relatives of homeodomain proteins, although the precise evolutionary origin of the homeodomain remains unclear. A pattern of hydrophobic residues is conserved across the alignment, with the main structural difference being the length of the loop between helices 1 and 2. Positively charged residues are often present, without being strictly conserved, in the proximal sequences lying N-terminal to helix 1 and C-terminal to helix 3 in the Mat proteins and both homeodomain families, but typically only in the C-terminal part of HTH-10 proteins. Each sequence is identified by its UniProt entry name, except for the *Dictyostelium* Mat proteins, where 'Dd' is *Dictyostelium discoideum*, 'Dc' is *D. citrinum*, 'Df' is *D. firmibasis*, 'Dg' is *D. giganteum*, and 'Di' is *D. intermedium*.

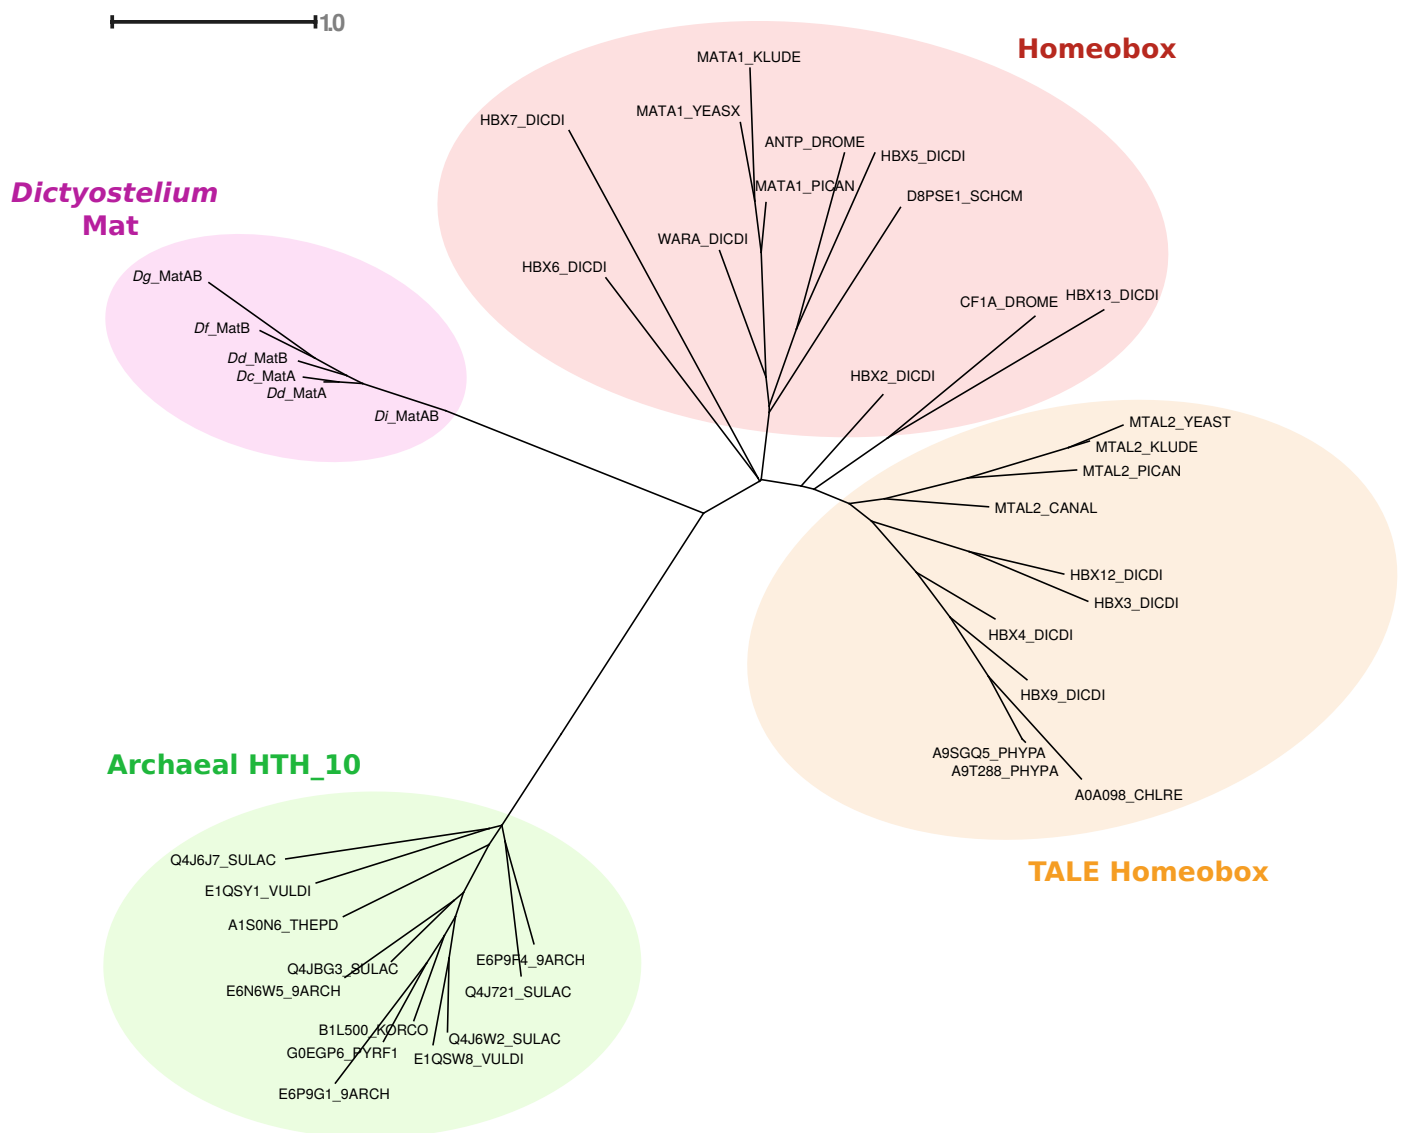

**fig. S8. Provisional phylogenetic placement *Dictyostelium* Mat proteins, homeodomains, and archaeal HTH domains.** A phylogram was constructed using the multiple sequence alignment in fig. S7 to provide a preliminary assessment of the phylogenetic placement of *Dictyostelium* Mat proteins. The same UniProt identifiers are used. The branch leading to the Mat proteins is long, even with the inclusion of 'conventional' *Dictyostelium* homeodomain sequences, making its placement difficult to determine. Based on functional similarities with known homeodomain proteins regulating sexual development, as well as the sequence and structural data presented in this study, we expect that their true position will be found to be nested within the tree of homeodomains (broadly speaking), having diverged since the origin of dictyostelia (or perhaps earlier in Amoebozoan evolution), but the data available to us now do not exclude the possibility that they arose from a horizontally-acquired bacterial or archaeal sequence. The identification of further Mat-related sequences will be important to clarify their evolutionary origins. The scale represents the number of substitutions per site.

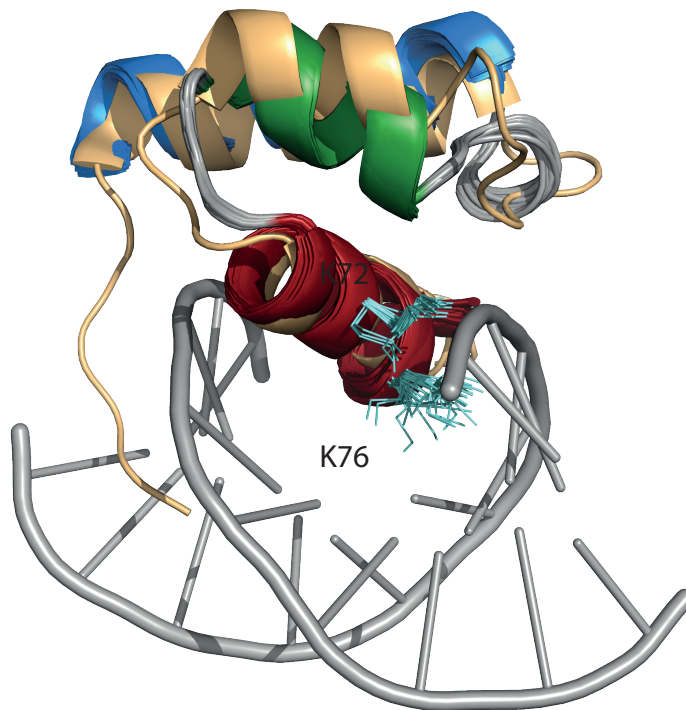

**fig. S9. Model of a potential DNA binding mode of MatA.** Overlaying the MatA NMR structural ensemble with the crystal structure (pdb 1APL) of *S. cerevisiae* MAT $\alpha$ 2 (light orange) bound to DNA (27) reveals residues that could potentially contact the DNA to coordinate the MatA-DNA interaction; the contributions of residues Lys-72 and Lys-76 (shown in turquoise) were assessed by testing mutants.

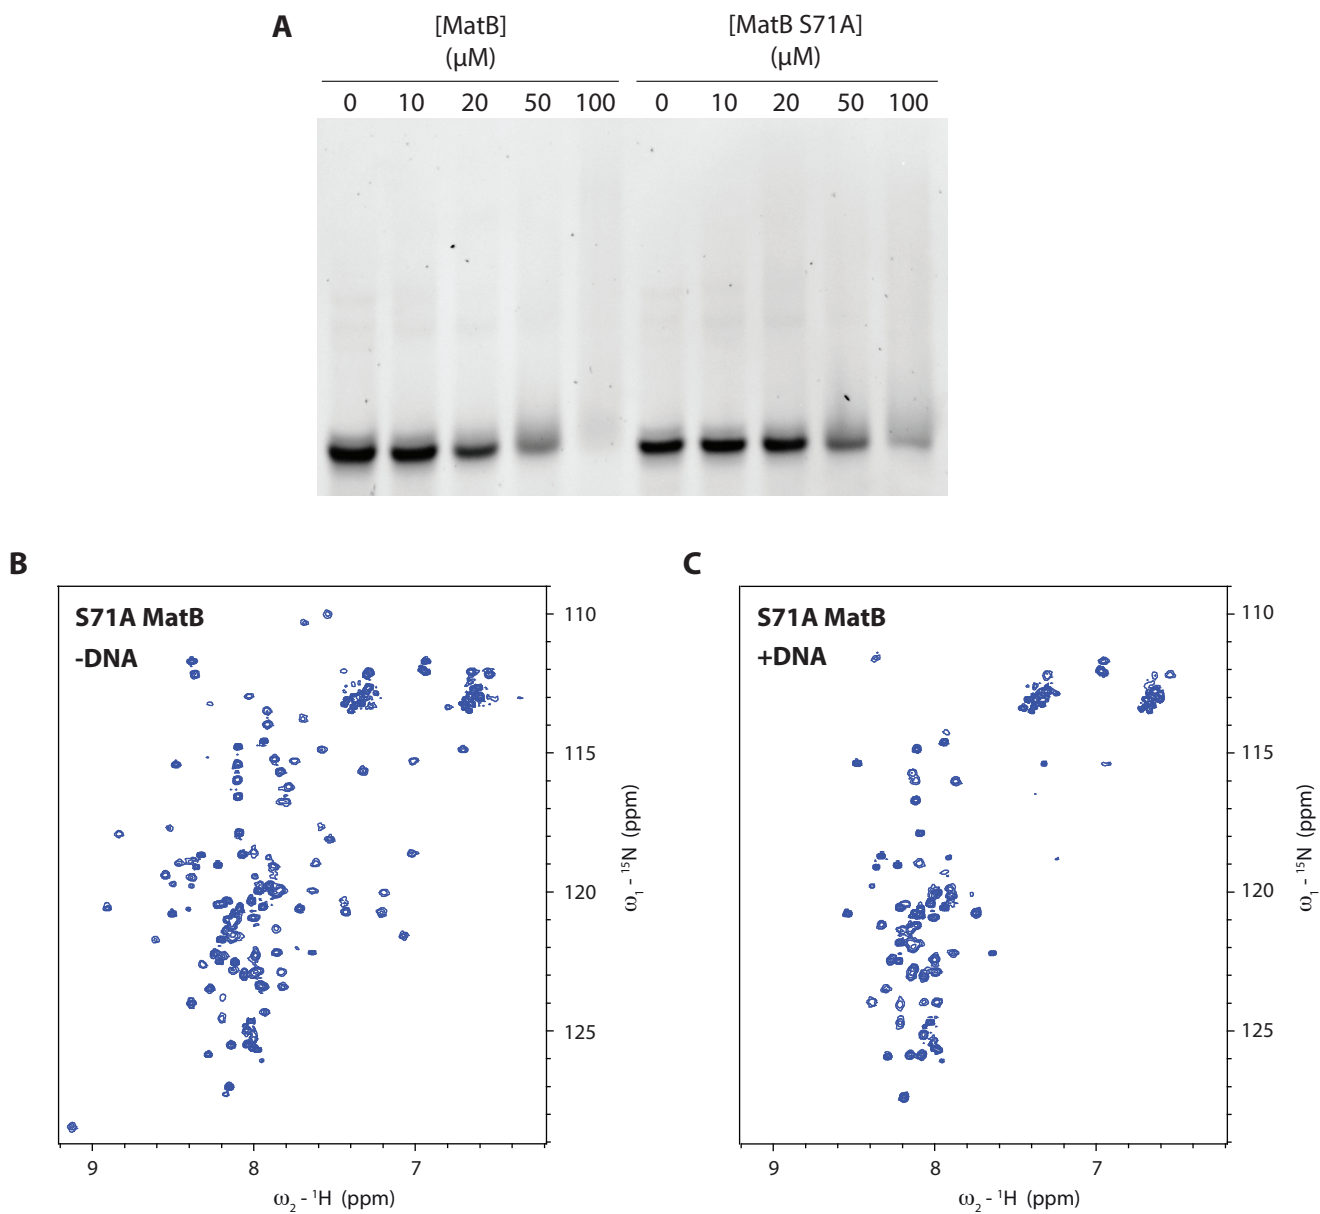

**fig. S10. The DNA binding activity of MatB S71A.** (A) EMSA experiments confirm that MatB S71A does bind, at least non-specifically, to double-stranded DNA. However, addition of DNA to a sample of MatB S71A in an NMR experiment (B and C) causes the loss of numerous peaks from throughout the folded core domain, likely due to line broadening caused by intermediate exchange between bound and unbound states of MatB. It was therefore not possible to characterise the DNA binding activity of MatB using this technique.

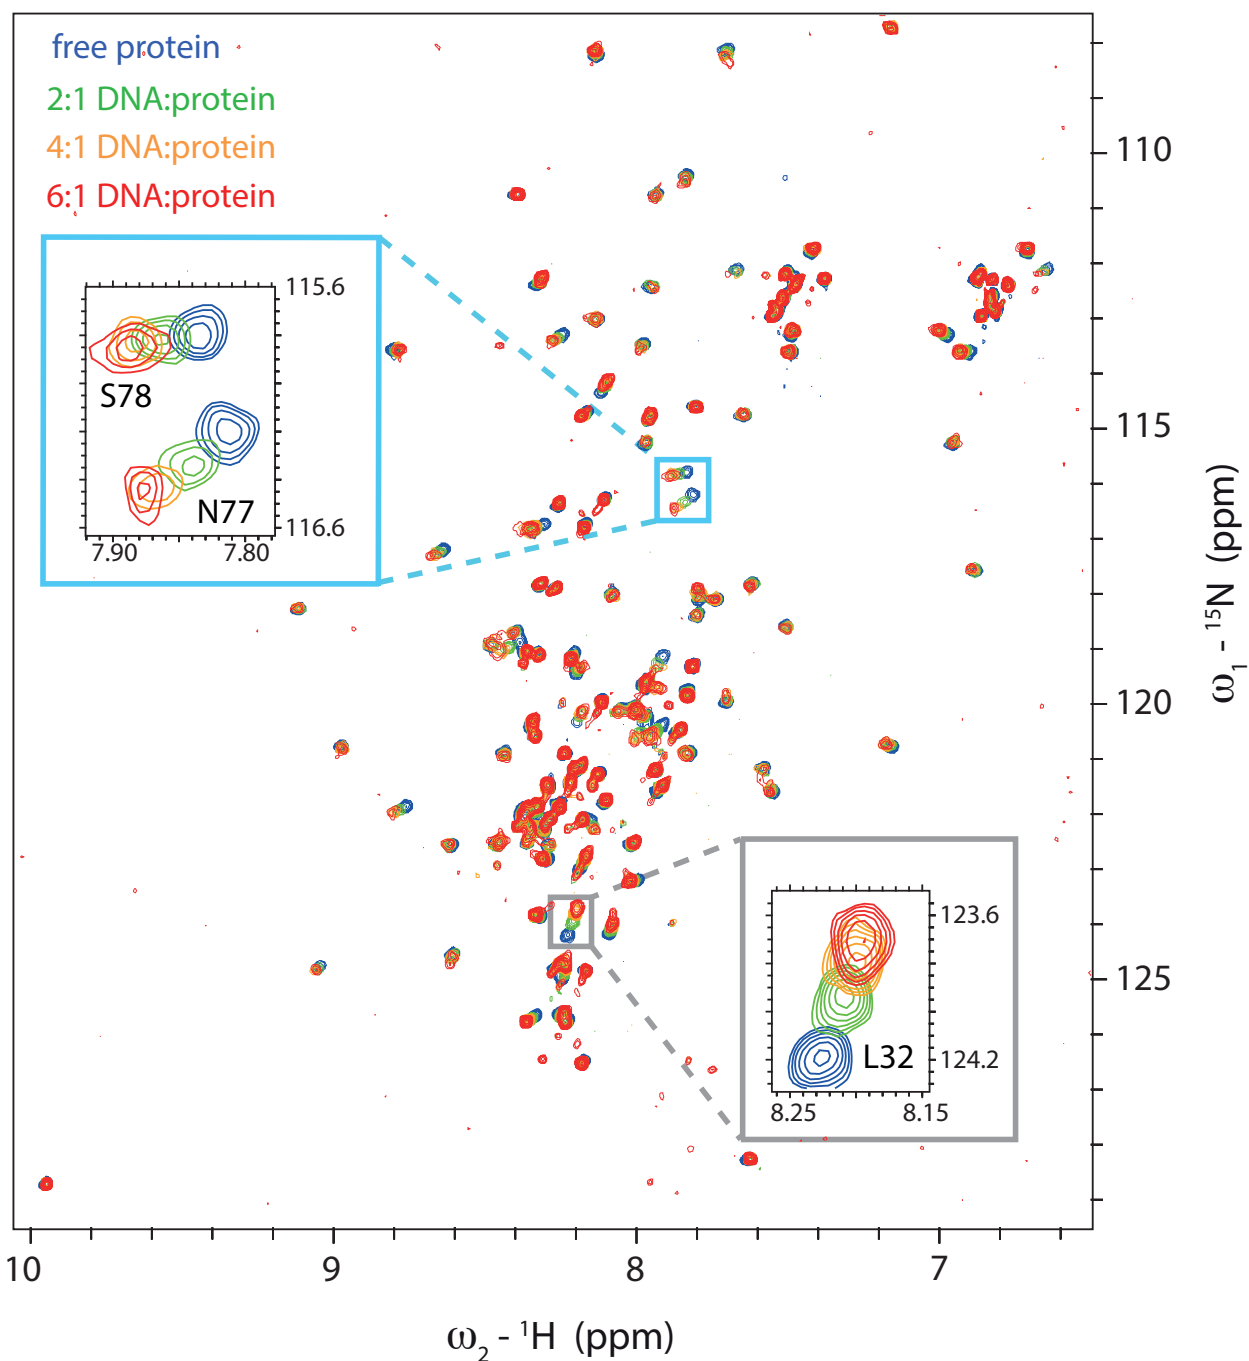

**fig. S11. CSPs for MatA as a function of added 58-bp DNA concentration.** Adding increasing amounts of the 58 bp DNA to MatA results in very similar chemical shift perturbations in the [ ${}^{15}\text{N}$ - ${}^1\text{H}$ ]-HSQC NMR spectrum as those seen as a function of increasing dsDNA length; because the binding to this non-cognate DNA is very weak, the protein remains unsaturated even at the highest DNA:protein ratio. These experiments employed MatA at 20  $\mu\text{M}$  and 58 bp DNA at 40  $\mu\text{M}$ , 80  $\mu\text{M}$  and 120  $\mu\text{M}$ , in 25mM phosphate pH 6.0, 50mM NaCl, 50  $\mu\text{M}$  EDTA.

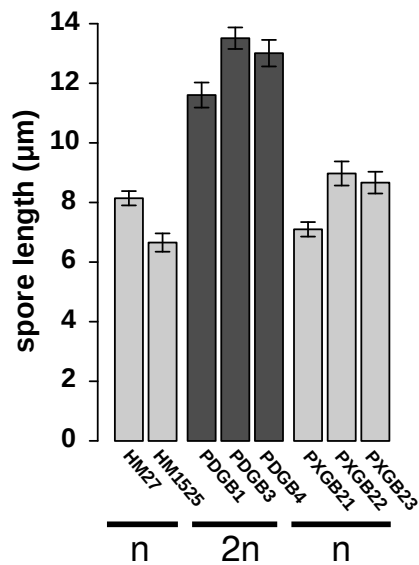

**fig. S12. Spore size of haploid and parasexual diploid strains.** Spores of parasexual diploids are larger than those of parental haploids, and segregant haploids have spores of similar size as the parental haploid strains. Fresh spores from the indicated strains were imaged using differential interference contrast microscopy and their length along their longest axis was measured. The mean  $\pm$  SEM of nine spores for each strain is shown. Spores of HM27, PXGB22, and PXGB23 are more elongated than those of HM1525 and PXGB21, as is typical of strains derived from the V12 background (75).

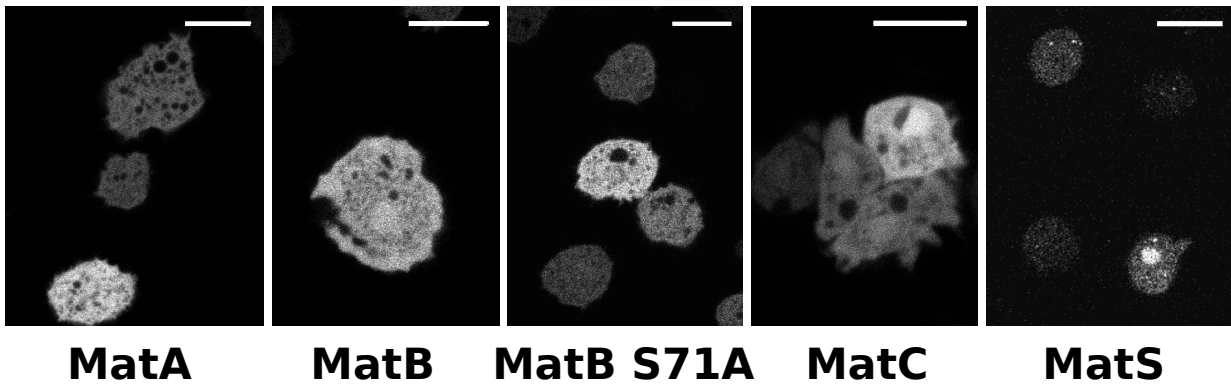

**fig. S13. Localization of Mat proteins tagged with fluorescent proteins.** The homeodomain-like folds and DNA-binding properties of MatA and MatB suggest that they function as transcription factors in the cell nucleus. When tagged with GFP and overexpressed, these proteins are distributed throughout the cytoplasm, with no evidence of exclusion from the nucleus, consistent with a nuclear function. We have not identified conditions in which these proteins localise to the nucleus preferentially compared with the cytosol. The S71A mutant of MatB behaves indistinguishably from wildtype MatB. Although the functions of MatC and MatS are not known, a parsimonious hypothesis is that they function cooperatively with MatA and MatB as transcriptional regulators. Although these proteins also tend to have evenly cytoplasmic conditions (with some suggestion that they form aggregates when overexpressed), when tagged with FusionRed (76), occasionally MatS has a localisation pattern consistent with nuclear enrichment.
